# Short Title: VEE complex, MADV and EEEV rRT-PCR

## Real-time RT-PCR for Venezuelan equine encephalitis complex, Madariaga and Eastern equine encephalitis viruses: application in clinical diagnostic and mosquito surveillance

Jean-Paul Carrera<sup>1,2,3#</sup>, Dimelza Araújo<sup>2</sup>, Alejandra Rojas<sup>4</sup>, Fátima Cardozo<sup>4</sup>, Victoria Stittleburg<sup>5</sup>, Josefrancisco Galue<sup>2,3</sup>, Carlos Lezcano-Coba<sup>2,3</sup>, Nikos Vasilakis<sup>6,7,8,9,10,11</sup>, Juan Miguel Pascale<sup>12</sup>, Anayansi Valderrama<sup>13</sup>, Christl A. Donnelly<sup>14,15</sup>, Nuno R. Faria<sup>15,16</sup>, Jesse J. Waggoner<sup>5,17,#</sup>

1 Department of Zoology, University of Oxford, Oxford, United Kingdom

2 Department of Research in Virology and Biotechnology, Gorgas Memorial Institute of Health Studies, Panama City, Panama

3 Viral Emerging Disease Dynamics group, Gorgas Memorial Institute of Health Studies, Panama City, Panama

4 Universidad Nacional de Asunción, Instituto de Investigaciones en Ciencias de la Salud, Departamento de Producción, Paraguay

5 Emory University, Department of Medicine, Division of Infectious Diseases, Atlanta, Georgia, USA

6 Department of Pathology, The University of Texas Medical Branch, Galveston, Texas, USA.

7 Department of Preventive Medicine and Population Health, The University of Texas Medical Branch, Galveston, Texas, USA.

8 Center for Biodefense and Emerging Infectious Diseases, The University of Texas Medical Branch, Galveston, Texas, USA.

9 Center for Vector-Borne and Zoonotic Diseases, The University of Texas Medical Branch, Galveston, Texas, USA.

10 Center for Tropical Diseases, The University of Texas Medical Branch, Galveston, Texas, USA.

11 Institute for Human Infection and Immunity, The University of Texas Medical Branch, Galveston, Texas, USA.

12 Clinical of Tropical Diseases and Research Unit, Gorgas Memorial Institute of Health Studies, Panama City, Panama

13 Department of Medical Entomology, Gorgas Memorial Institute of Health Studies, Panama City, Panama

14 Department of Statistics, University of Oxford, Oxford, United Kingdom

15 MRC Centro for Global Infectious Disease Analysis (MRC-GIDA), Department of Infectious Disease Epidemiology, Imperial College London, London United Kingdom

16 Instituto de Medicina Tropical, Faculdade de Medicina da Universidade de São Paulo, São Paulo, Brazil

17 Rollins School of Public Health, Department of Global Health, Atlanta, Georgia, USA

#Address correspondence to: Jean-Paul Carrera, Peter Medawar Building for Pathogen Research, Oxford, UK, OX1 3SY. Email: [jean.carrera@zoo.ox.ac.uk](mailto:jean.carrera@zoo.ox.ac.uk) or Jesse J. Waggoner, 1760 Haygood Drive NE, Room E-169, Bay E-1, Atlanta, GA, USA, 30322. Email: [jjwaggo@emory.edu](mailto:jjwaggo@emory.edu); Telephone: +1 (404) 712-2360.

Word Count: Abstract, 223; Manuscript, 3358

Inserts: Tables 3, Figure 1

## Abstract

**Background.** Venezuelan equine encephalitis (VEE) complex, eastern equine encephalitis virus (EEEV), and Maradiaga virus (MADV), are associated with severe neurological disease in human and equine hosts. We aimed to overcome the lack of available molecular diagnostics for these pathogens by designing and clinically evaluating real-time reverse transcription PCRs (rRT-PCRs) for 1) VEE complex and 2) MADV/EEEV.

**Methodology/Principal Findings.** Primers and probes were designed from alignments of all publicly available complete genome sequences for VEE complex, EEEV and MADV. Linear range for the VEE complex and MADV/EEEV rRT-PCRs extended from 2.0 to 8.0 log<sub>10</sub> copies/μL with exclusive detection of the respective viruses. Fifteen serum samples from febrile patients collected from 2015 and 2017 outbreaks in Panama were tested to evaluate the new assays. Ten samples (66.7%) samples were positive for VEEV, and in one of these ten samples, rRT-PCR detected both VEEV and MADV. The remaining five samples were negative for both MADV and VEEV. Three acute samples ( $\leq 3$  days since onset) with coincidental anti-VEEV IgM and IgG antibodies were also found positive for VEEV viral RNA. Of 150 mosquito pools, 3 tested positive for VEEV by rRT-PCR. Two of these yielded VEEV isolates.

**Conclusions.** The VEE complex and MADV/EEEV rRT-PCRs provide accurate detection while yielding significant benefits over currently available molecular methods. Outcomes from the clinical evaluation provide further evidence for VEE complex and MADV co-infections and suggest that re-infection with VEE complex viruses is possible.

**Keywords:** Venezuelan equine encephalitis, Madariaga virus, Eastern equine encephalitis virus, alphavirus, rRT-PCR

## Author Summary

The alphavirus encephalitis viruses include species of the Venezuelan equine encephalitis (VEE) complex, Maradiaga virus (MADV), and Eastern equine encephalitis virus (EEEV). They persist in sylvatic-enzootic cycles throughout the Americas and are transmitted to humans by *Culex* spp. mosquitoes. Human and equine outbreaks are reported sporadically in endemic regions. Detection of VEE complex, MADV and EEEV infections in the acute phase is complicated by their non-specific clinical manifestations and lack of widely available diagnostic tools. Current molecular tests lack optimal performance metrics characteristics necessary for routine diagnostic testing. Here we design two real-time RT-PCRs for VEE complex and MADV/EEEV, which were then evaluated by testing a set of clinical and mosquito samples collected during two outbreaks of VEEV and MADV in Panamá. The VEE complex and MADV/EEEV rRT-PCRs provide accurate detection while yielding significant benefits over currently available molecular methods.

## Introduction

The new world encephalitis alphaviruses (*Togaviridae*, genus *Alphaviridae*) that comprise the Venezuelan equine encephalitis complex (VEE complex), Madariaga virus (MADV), and eastern equine encephalitis virus (EEEV) are single-stranded RNA viruses with genomes of approximately 11.7 kb, encoding four non-structural proteins (nsP1 to nsP4) and five structural proteins (capsid, E1, E2, E3 and 6K) [1,2]. These alphaviruses persist in sylvatic-enzootic cycles throughout the Americas and are transmitted to humans by *Culex* spp. mosquitoes [2,3]. VEEV, MADV and EEEV all have the potential to cause human infection, and certain VEE complex virus (VEEV) subtypes have been associated with large epizootic outbreaks involving equids and humans (VEEV subtypes IA/B and IC). Most infections in humans are asymptomatic or subclinical, however patients may develop an acute febrile illness with headache, myalgias, arthralgias, nausea and vomiting [2,4–6], which may progress to severe disease including encephalitis and the development of long-term neurologic sequelae [1,2,6].

Serologic evidence of transmission and acute symptomatic cases have been identified throughout tropical regions of Central and South America, indicating that VEE complex viruses may be relatively common but remain largely underdiagnosed[1]. MADV, previously classified as South American EEEV, is an emerging viral infection that was first identified in 2010 in the Darién province of Panamá, where VEEV subtype ID has also been detected [1–3,6]. Before the 2010 outbreak in Panama, MADV was mostly associated with equine disease and only a few human cases had been detected in Trinidad and Tobago and Brazil[7]. This contrasts with the epidemiological profile of North American EEEV, which is associated with severe and fatal human cases [8]. Diagnostic tools are not widely available for MADV, and its prevalence

outside of Darién in Panama remains poorly characterized. A geographic expansion of the Panamanian MADV strain into Haiti has been reported recently, highlighting the potential of MADV cases to invade new areas [9].

Detection of VEE complex, MADV and EEEV infections in the acute phase is complicated by their non-specific clinical manifestations and lack of widely available diagnostic tools. Antigen-based methods are unavailable, and although serology can confirm the diagnosis, this requires paired acute and convalescent samples [2]. Current molecular tests lack optimal performance metrics characteristics necessary for routine diagnostic testing [10–16]. Molecular assay designs have been complicated by the genetic variability of the VEE complex viruses, which comprise of at least 14 different viral subtypes[1]. VEEV infections are often misdiagnosed as dengue virus, due to overlapping clinical symptoms during the acute phase[1], and the recent identification of MADV as a unique species and human pathogen also complicates the clinical diagnosis of both etiologies[8]. Common molecular tests for VEE complex viruses employ pan-alphavirus primers to amplify a 400-500bp region of the genome with subsequent identification of the viral complex or species by sequencing or nested PCR [2,10,11,13,15–17]. Such methods are laborious and increase opportunities for laboratory contamination. In addition, pan-alphavirus primers and conventional reverse transcription-polymerase chain reaction (RT-PCR) chemistry may be less sensitive than real-time RT-PCR (rRT-PCR). However, few rRT-PCR methods have been reported in the literature to date to detect and differentiate VEEV and MADV[18].

The primary objective of the current study was to design rRT-PCRs for the VEE complex and MADV. As a secondary objective, a duplex MADV/EEEV rRT-PCR was developed to

differentiate these two pathogens. The two assays, for VEE complex and MADV/EEEV, were then evaluated by testing a set of clinical samples from an outbreak of VEEV and MADV in Panamá.

## Materials and Methods

### Ethics statement

The use of human samples was approved by the Panamanian Ministry of Health (protocol number 2077), Gorgas's IRB (protocol: 335/CBI/ICGES/21), Emory University IRB (IRB00097089), and the Ethics Committee of the Instituto de Investigaciones en Ciencias de la Salud, Universidad Nacional de Asunción (P06/2017).

### Study site and field methods

Acute human samples used in the protocol validation were collected in communities of Darien, the most eastern province in Panama, during two alphavirus outbreaks in 2015 and 2017. These communities include Metetí, Cemaco, Tucutí, Yaviza, Nicanor, La Palma and El Real de Santa María (Figure 1). The Darien province borders Colombia and encompasses the Darien Gap, and the Darien National Park, a UNESCO-designated World Heritage Site [19]. For mosquito collections, a forested section of 100 x 100 meters within El Real de Santa María was selected for this study. Acute human febrile cases were identified during the 2015 outbreak response team during the active surveillance in El Real de Santa María, this was the main selection criteria for mosquito collection. In addition, previous Alphavirus encephalitis outbreaks are frequently reported in El Real de Santa María[2,20].

## **Patient recruitment**

Febrile patients were identified during an enhanced surveillance program, by our outbreak response team using house-by-house visits during the 2015 and 2017 outbreaks. Blood samples were drawn from patients that met the case definition during the outbreak investigation. The case definition of a suspected case included fever and headache, while a probable case was defined as a suspected case plus somnolence, lethargy or convulsions. Blood samples were centrifuged in the field to obtain the serum, which was stored in liquid nitrogen for transportation to the Gorgas Memorial Institute of Health Studies.

## **Mosquito collection**

Mosquito collections with CDC light traps were undertaken in the township of El Real de Santa María during an alphavirus outbreak response in 2015. Collections performed over a period of 12 hours, from 6:00 pm to 6:00 am at height of 1.5 m above ground level. Traps (BioQuip Products, Rancho Dominguez, CA) were baited with octanol and CO<sub>2</sub> for encephalitis vector survey. The following day, mosquitoes were collected in the field and transported to the base camp where they were anesthetized, identified to the species level using taxonomic keys[21] and placed in cryovials for storage in liquid nitrogen. Mosquitos were grouped at the species level and a maximum 20 individuals were used to produce mosquito pools for rRT-PCR, serology and isolation.

## **Alphavirus serology**

All human serum samples were tested in duplicate for IgM antibodies to MADV and VEEV antigen using an enzyme-linked immunosorbent assays (ELISA), and confirmed by a plaque-

reduction neutralization test (PRNT). For the ELISA, sucrose-acetone antigens were prepared from EEEV- (prepared by Dr. Robert Shope at the Yale Arbovirus Research Unit in August 1989) and VEEV- (strain 78V-3531) infected mouse brain. For the PRNT, we used chimeric Sindbis virus SINV/MADV (derived from Brazilian MADV strain BeAn436087 and shown to be an accurate surrogate for MADV in these assays [22] and TC83, an attenuated vaccine strain of VEEV closely related to subtype ID strains that circulate in Panama [23]. The neutralizing antibody titer was determined as the reciprocal of the highest dilution that reduced plaque count by 80% (PRNT<sub>80</sub>).

## **Viral isolation**

Mosquito pool homogenates were prepared with 20 – 50 mosquitos in 2 mL of minimum essential medium supplemented with penicillin and streptomycin, and 20% fetal bovine serum, homogenized using a Tissue Lyser (Qiagen, Hidden, Germany), and centrifuged at 12000 rpm for 10 mins. A total of 200 µL of serum or mosquito homogenate was inoculated in each of two 12.5-cm<sup>2</sup> flasks of Vero cells. Samples were passaged twice and monitored for cytopathic effect (CPE).

## **Generic alphavirus RT-PCR**

Viral RNA was extracted from human sera and mosquito pool homogenates using QIAamp RNA viral extraction kit (Qiagen, Valencia, CA). Viral RNA from mosquitos were also extracted using the Macherey-Nagel extraction kit (Düren, Germany). Sera and mosquito homogenates were tested for alphaviruses using a universal alphavirus RT-PCR described previously[16]. Amplicons generated were eluted from agarose gels, purified using the QIAquick PCR



purification kit (Qiagen, Valencia, CA) and sequenced directly using an Applied Biosystems (Foster City, CA) 3500 Genetic Analyzer following the manufacturer's protocols.

# **VEE complex, EEEV and MADV rRT-PCR design**

Separate alignments were prepared for the VEE complex, EEEV and MADV using all publicly available complete genome sequences from the NCBI Nucleotide database[24] and aligned with MegAlign software (DNASTAR, Madison, WI). The VEE complex alignment included all complete genomes from the following viruses: Cabassou, Everglades, Mosso das Pedras, Mucambo, Pixuna, Rio Negro, Tonate, and Venezuelan equine encephalitis. The VEE complex alignments were made in 2016 (n=121 sequences) and a similar alignment for MADV was made in 2019 (n=32). Primers and probes were designed with Primer3 software (primer3.ut.ee) such that each oligonucleotide contained  $\leq 1$  degenerate base and matched  $\geq 95\%$  of available sequences for a given virus. In silico primer/probe specificity was checked by aligning sequences in BLAST (blast.ncbi.nlm.nih.gov) against (1) all available sequences and (2) only alphavirus sequences while excluding the VEE complex or MADV, respectively. Due to the similarity between MADV primers and EEEV sequences, all available EEEV complete genome sequences (n=441) were aligned and separate MADV and EEEV probes were designed for an rRT-PCR duplex assay. Alignments for each virus were repeated with all sequences available in September 2021 to confirm primer and probe sequences in contemporary strains.

# **rRT-PCR assay performance and optimization**

rRT-PCRs were performed in 25 $\mu$ L reactions using the SuperScript III Platinum One-Step Quantitative RT-PCR Kit (Thermo Fisher, Waltham, MA) with 5 $\mu$ L of nucleic acid template.

Analytical evaluation was performed on a Rotor-Gene Q instrument (Qiagen, Germantown, MD), and the validation with serum and mosquito pool samples were performed on an ABI7500 (Thermo Fisher). Cycling conditions were consistent with previous laboratory protocols: 52 °C × 15 min, 94 °C × 2 min, and 45 cycles of 94 °C × 15 s, 55 °C × 40 s (acquire in all channels), and 68 °C × 20 s (16-19). Primer and probe sets were evaluated in singleplex reactions containing 200nM of each oligonucleotide and genomic RNA or quantified ssDNA containing the target region. Primer/probe sets were selected to generate the most sensitive detection based on cycle threshold (Ct) values, with preserved specificity. Primer and probe concentrations in the final reaction were then adjusted between 100nM and 400nM to optimize assay sensitivity.

Primers were obtained from Integrated DNA Technologies (IDT, Coralville, Iowa); probes were obtained from Biosearch Technologies (Hoddesdon, United Kingdom). VEEV subtype IC and EEEV genomic RNA was purchased from Vircell Microbiologists (Granada, Spain). Quantified ssDNA containing the assay target region (IDT, Coralville, Iowa) was used for all viruses to quantify analytical performance. For ssDNA synthesis, target region sequences were selected from specific strains of VEE subtype IAB (Accession number KC344505.2) and subtype IV (Pixuna virus, Accession number NC\_038673.1), MADV (Accession numbers MH359233.1 and KJ469626.1), and EEEV (Accession number KX029319.1).

### **Analytical evaluation**

The linear range of the assay was determined by testing synthesized targets from each reference strain in quadruplicate at 8.0, 6.0, 4.0, 2.0, and 1.0 log<sub>10</sub> copies/μL. The linear range was defined as the range of concentrations at which 1) all replicates were detected and 2) the linear regression

of Ct values (y, dependent variable) versus  $\log_{10}$  copies/  $\mu\text{L}$  (x, independent variable) generated an  $R^2 \geq 0.99$ . For the VEE complex, the lower limit of 95% detection (95% LLOD) was determined by testing 10 replicates of 2-fold serial dilutions from 200 to 25 copies/ $\mu\text{L}$ . For MADV and EEEV, the 95% LLOD was calculated directly from the linear range. Assay exclusivity was evaluated by testing genomic RNA from the following viruses (strain in parentheses, if designated): Rift Valley fever (h85/09); Zika (MR766); dengue virus serotype 1 (Hawaii 1944), dengue virus serotype 2 (NGC), dengue virus serotype 3 (Sleman/78), and dengue virus serotype 4 (H241); Chikungunya virus (R80422); Mayaro virus (ARV 0565, INHRR 11a-10); yellow fever virus (17D and Asibi strains); West Nile virus (NAL); St. Louis encephalitis virus (GML 902612, CorAn 9275); tick-borne encephalitis virus; Japanese encephalitis virus; Semliki forest virus; Ross river virus; Getah virus; Barmah forest virus; and Una virus (20). Specificity was also evaluated by testing 56 serum samples from locations without known transmission of VEEV or MADV. These included 8 samples collected from patients in Georgia, USA, without known travel history, and 48 samples from individuals with an acute febrile illness in Asunción, Paraguay. The latter samples have been described in detail previously (21). Total nucleic acids were extracted from 200 $\mu\text{L}$  of serum on an EMAG instrument (bioMérieux, Durham, NC), eluted in 50 $\mu\text{L}$  and run in the VEE complex and MADV/EEEV rRT-PCRs.

## Statistics

Linear regression fitting and linear range calculations, including  $R^2$  of the best-fit line were performed in Excel (Microsoft, Redmond, WA). Concentrations and replicates in the linear range

study that did not yield Ct values were not included in the linear regression analysis. Probit analyses were performed using MedCalc, v20.013 (MedCalc Software, Belgium).

## Results

### Characteristics of the clinical samples

A total of 15 febrile patients that met the suspected case definition were used to validate the new molecular assays. Samples were collected in Panama in 2015 and 2017, between 0 to 5 days of clinical evolution (Table 1).

### Mosquitos

A total of 1307 mosquitos belonging to 35 species and 12 genera were collected in the community of El Real de Santa Maria, Panama, during a period of five days in 2015 (Table 2). The most abundant mosquito species was *Coquilletidia venezualencis* at 37.5 % and *Culex Melanoconion vomerifer* at 34.4%. The remaining mosquitos collected are presented in Table 2.

### rRT-PCR analytical evaluation

Primers and probes for the VEE complex singleplex and MADV/EEEV duplex rRT-PCRs are shown in Table 3 along with the optimized final reaction concentrations. The linear range for each assay extended from 2.0 to 8.0 log<sub>10</sub> copies/μL (Figure 2A-D). For the VEE complex assay, the linear range was evaluated with ssDNA for subtypes IAB and IV and RNA from subtype IC (2.0 to 5.0 log<sub>10</sub> copies/μL; Figure 1A-B). The 95% LLODs, expressed in copies/μL, were:

VEEV subtype IAB, 120; VEE subtype IV, 110; MADV, 19; EEEV, 19. Assay exclusivity was

evaluated by testing genomic RNA from VEEV subtype IC, EEEV, and a set of arboviruses, including flavi-, bunya-, and alphaviruses on a single run of the VEE complex and MADV/EEEV rRT-PCRs. VEEV and EEEV only yielded signal in the respective assays for these viruses. None of the other tested viruses generated signal in either assay. In addition, none of the 56 serum samples from Georgia, USA, or Asunción, Paraguay, tested positive in either assay.

### **Viral detection in clinical samples and mosquito pools**

Previously, a total of eleven (11/15) acute sera samples collected during the in 2015 and 2017 alphavirus outbreaks had tested positive using a generic alphavirus RT-PCR [16], and were confirmed latter by sequencing as VEEV-ID infections. In 2021, a second round of generic alphavirus RT-PCR using the same set of primers was run on these fifteen stored samples, and all of them tested negative. Contrastingly, using the newly designed rRT-PCR, we were able to detect 10 VEEV RNA positive samples, including two samples that had tested negative at the initial screening in 2017 (Table 1). Three of the VEEV rRT-PCR-positive samples were also anti-VEEV IgG and IgM positive, with only 0, 2, and 3 days since onset of symptoms, respectively (Table 4). One sample was rRT-PCR positive for both VEEV and MADV viruses. Of 150 mosquito pools, 3 *Cx. Mel. vomerifer* mosquito pools tested positive for VEEV with the rRT-PCR. Two of these rRT-PCR positive pools also yielded viral isolates.

### **Discussion**

Over the past 40 years, various molecular assays have been developed for the detection of VEEV and VEE complex viruses [5,11–18,25]. Many involve conventional or nested RT-PCRs that

employ pan-alphavirus primers to amplify a large region of the genome, with subsequent species differentiation using specific nested primers, biotinylated probes, sequencing, or melt-curve analysis [11–17]. Vina-Rodriguez et al., reported an rRT-PCR that was designed from an alignment of 33 VEEV sequences [18]. Development of this assay did not include other species that comprise the VEE complex, and clinical samples were not available for evaluation [18]. Our VEE complex singleplex and MADV/EEEV duplex rRT-PCRs provide accurate detection and real-time differentiation of VEE complex, MADV and EEEV. These were designed using a greater number of complete genome sequences with confirmation *in silico* that the primers and probes match contemporary alignments. Using these assays, we detected VEEV and MADV in samples that had tested negative with a reference RT-PCR [16]. Interestingly, our new method has failed to detect two sample that previously tested positive back in 2015 using the alphavirus generic primers[16]. However, a second round of the generic Alphavirus RT-PCR undertaken in 2017 with same primers have also failed to reamplify the former positives. Viral RNA degradation over time is a likely explanation of these false negative samples[26]. Taken together, these data demonstrate the potential of these methods to improve VEE complex, MADV and EEEV molecular detection, even in long time storage samples.

Species of the VEE complex have been detected throughout the Americas, and in certain locations, VEE complex may account for a significant proportion of non-dengue acute febrile illness (1, 5). However, it is likely that both VEE complex viruses and MADV remain underdiagnosed due to the lack of available and convenient methods for detection. VEEV subtype 1D, and MADV have been identified in Panamá, with co-circulation detected in the Darién province along the Colombian border [2,3,6]. Co-circulation and the potential for co-

infection with these two viruses complicate their detection, particularly when existing molecular methods cannot distinguish between these pathogens[16]. In this study, we identified an individual with a VEEV-MADV co-infection, highlighting another advantage of our VEE complex and MADV/EEEV rRT-PCRs over previous methods. Co-infection cases are epidemiologically significant and may have clinical relevance if co-infections are associated with more severe disease[2].

The similar clinical presentation of two related alphavirus, VEEV and MADV, also complicates alphavirus diagnosis and surveillance in endemic regions. Cases are often detected during the neurological phase of the disease [2,27]. At this stage, the virus has been cleared from the serum and diagnosis relies mostly on serological testing [2,27]. Because alphaviruses can induce an IgM response that lasts up to 2 to 3 months, the detection of anti-VEEV or -MADV IgM alone could yield a misdiagnosis if seroconversion is not observed [2]. Our newly developed VEE complex and MADV/EEEV rRT-PCR can be rapidly incorporated into diagnostic algorithms in endemic regions. The currently developed rRT-PCR allowed us to detect VEEV viral RNA in samples collected from patients in the first few days of symptoms, whereas alphavirus IgM and IgG antibody responses usually develop >5–7 days post symptom onset[28]. Interestingly, three patients with detectable VEE RNA were also VEEV IgM and IgG-reactive, suggesting that VEEV re-infections are possible, a finding with potential implications for alphavirus vaccine development.

VEEV rRT-PCR positives were detected in three mosquito pools from the *Cx. Mel. vomerifer* species trapped during the 2015 outbreak in El Real de Santamaria, Panama. Mosquitos from the *Cx. Mel. vomerifer* have been previously incriminated as a vector of VEEV in Panama [1]. Two

mosquito pools also yielded viral isolates, while one was only positive by rRT-PCR. None of the original pan-alphavirus convectional RT-PCRs were able to detect viral RNA in the mosquito pools. This suggests that the newly designed rRT-PCR has an increased sensitivity to detect VEEV viral RNA in mosquito vectors. No MADV infections in mosquito were detected during this investigation by either pan-alpha, rRT-PCR or isolation methods. The same pattern of lack of MADV isolation or detection in mosquitoes was observed during additional outbreak investigations undertaken by our group in Panama [29,30]. Interestingly, low MADV frequency of isolation was also observed during extensive mosquito investigations undertaken during the 1940-60s in Panama by the Gorgas Memorial Laboratory; in these occasions MADV was only isolated twice from *Cx. Mel. taeniopus* in 1964 and 1973, respectively [31,32]. Taken together, the early reports along with recent evidence suggest that mosquito vectors in Panama may be infected with MADV at a lower frequency when compared with VEEV. The reasons for this variation in MADV and VEEV frequency of isolation or detection from mosquitos are still unclear and may include variation in vector competence or viral heterologous competition.

For the current study, we were able to demonstrate assay performance using a small set of human samples and mosquitos, but additional prospective testing is warranted to fully characterize the assays' clinical and surveillance performance. An additional limitation of this study is that the design requires two separate assays for three viruses. The optimal design targets for the VEE complex and MADV overlap in this highly conserved region. The two rRT-PCRs can be performed together on a single run, however, which improves lab workflow, and the VEE complex assay can be multiplexed with rRT-PCRs for other neurotropic arboviruses such as



West Nile and St. Louis encephalitis viruses without a loss in performance (manuscript in preparation).

In summary, we describe novel VEE complex and MADV/VEEV rRT-PCRs that provide sensitive and specific detection while yielding significant benefits over available methods, allowing us to detect VEEV-MADV co-infection and VEEV human infection in samples that were negative with other techniques. Early acute samples ( $\leq 3$  days since onset of symptoms), with coincidental VEEV specific antibodies and VEEV viral RNA suggest that VEEV re-infections are possible. In addition, our newly developed method also allows us to detect VEEV active viral circulation in mosquitos collected during an alphavirus outbreak response. The implementation of the assays in regions of endemicity may improve the identification and characterization of these neurotropic alphaviruses.

## Acknowledgements

We thank Yaneth Pittí, Oriol Lezcano and Eddier Rivera and Mileika Santos for technical support with sample processing and mosquito classification and Alberto Cumbre for the map construction. We also thank Kathryn Hanley for review and editions to the manuscript.

## Funding Sources

JPC is funded by the Clarendon Scholarship from University of Oxford and Lincoln-Kingsgate Scholarship from Lincoln College, University of Oxford (grant number SFF1920\_CB2\_MPLS\_1293647). This work was supported by SENACYT, through the grants number FID-16-201 and FID-20-96 grant to JPC; the National Institute of Allergy and Infectious Diseases, National Institutes of Health (grant K08AI110528 to JJW) and Centers for Research in

405 Emerging Infectious Diseases (CREID-CREATE-NEO) 1U01AI151807 grant awarded to NV by  
406 the National Institutes of Health (NIH); and by the Medical Research Council □ São Paulo  
407 Research Foundation CADDE partnership award (MR/S0195/1 and FAPESP18/14389 □ 0 to  
408 NRF) (<https://caddecentre.org>). NRF is supported by Wellcome Trust and Royal Society (Sir  
409 Henry Dale Fellowship. 204311/Z/16/Z).

# References

1. Aguilar P v., Estrada-Franco JG, Navarro-Lopez R, Ferro C, Haddow AD, Weaver SC. Endemic Venezuelan Equine Encephalitis in the Americas: Hidden under the dengue umbrella. *Future Virology*. 2011. doi:10.2217/fvl.11.50
2. Carrera J-P, Forrester N, Wang E, Vittor AY, Haddow AD, López-Vergès S, et al. Eastern Equine Encephalitis in Latin America. *New England Journal of Medicine*. 2013. doi:10.1056/nejmoa1212628
3. Vittor AY, Armien B, Gonzalez P, Carrera J-P, Dominguez C, Valderrama A, et al. Epidemiology of Emergent Madariaga Encephalitis in a Region with Endemic Venezuelan Equine Encephalitis: Initial Host Studies and Human Cross-Sectional Study in Darien, Panama. *PLoS Neglected Tropical Diseases*. 2016;10. doi:10.1371/journal.pntd.0004554
4. Forshey BM, Guevara C, Laguna-Torres VA, Cespedes M, Vargas J, Gianella A, et al. Arboviral etiologies of acute febrile illnesses in western south America, 2000-2007. *PLoS Neglected Tropical Diseases*. 2010;4. doi:10.1371/journal.pntd.0000787
5. Aguilar P v., Greene IP, Coffey LL, Medina G, Moncayo AC, Anishchenko M, et al. Endemic Venezuelan Equine Encephalitis in Northern Peru. *Emerging Infectious Diseases*. 2004;10. doi:10.3201/eid1005.030634
6. Carrera JP, Pittí Y, Molaes-Martínez JC, Casal E, Pereyra-Elias R, Saenz L, et al. Clinical and serological findings of Madariaga and Venezuelan equine encephalitis viral infections: A follow-up study 5 years after an outbreak in Panama. *Open Forum Infectious Diseases*. 2020. doi:10.1093/ofid/ofaa359
7. Aguilar P v., Robich RM, Turell MJ, O'Guinn ML, Klein TA, Huaman A, et al. Endemic Eastern Equine Encephalitis in the Amazon region of Peru. *American Journal of Tropical Medicine and Hygiene*. 2007. doi:10.4269/ajtmh.2007.76.293
8. Arrigo NC, Adams AP, Weaver SC. Evolutionary Patterns of Eastern Equine Encephalitis Virus in North versus South America Suggest Ecological Differences and Taxonomic Revision. *Journal of Virology*. 2010. doi:10.1128/jvi.01586-09
9. Lednicky JA, White SK, Mavian CN, el Badry MA, Telisma T, Salemi M, et al. Emergence of Madariaga virus as a cause of acute febrile illness in children, Haiti, 2015-2016. *PLoS Neglected Tropical Diseases*. 2019. doi:10.1371/journal.pntd.0006972
10. Pfeiffer M, Proebster B, Kinney RM, Kaaden OR. Genus-specific detection of alphaviruses by a semi-nested reverse transcription-polymerase chain reaction. *American Journal of Tropical Medicine and Hygiene*. 1997;57. doi:10.4269/ajtmh.1997.57.709
11. Brightwell G, Brown JM, Coates DM. Genetic targets for the detection and identification of Venezuelan equine encephalitis viruses. *Archives of Virology*. 1998;143. doi:10.1007/s0070500050326
12. Romeiro MF, de Souza WM, Tolardo AL, Vieira LC, Henriques DA, de Araujo J, et al. A real-time RT-PCR for rapid detection and quantification of mosquito-borne alphaviruses. *Archives of Virology*. 2016;161. doi:10.1007/s00705-016-3019-0
13. Linssen B, Kinney RM, Aguilar P, Russell KL, Watts DM, Kaaden OR, et al. Development of reverse transcription-PCR assays specific for detection of equine encephalitis viruses. *Journal of Clinical Microbiology*. 2000;38. doi:10.1128/jcm.38.4.1527-1535.2000
14. Wang E, Paessler S, Aguilar P v., Carrara AS, Ni K, Greene IP, et al. Reverse transcription-PCR-enzyme-linked immunosorbent assay for rapid detection and

- differentiation of alphavirus infections. *Journal of Clinical Microbiology*. 2006;44.  
doi:10.1128/JCM.00175-06
15. Pisano MB, Seco MPS, Ré VE, Farías AA, Contigiani MS, Tenorio A. Specific detection of all members of the Venezuelan Equine Encephalitis complex: Development of a RT-Nested PCR. *Journal of Virological Methods*. 2012;186.  
doi:10.1016/j.jviromet.2012.05.009
16. Sánchez-Seco MP, Rosario D, Quiroz E, Guzmán G, Tenorio A. A generic nested-RT-PCR followed by sequencing for detection and identification of members of the alphavirus genus. *Journal of Virological Methods*. 2001. doi:10.1016/S0166-0934(01)00306-8
17. Bronzoni RVM, Moreli ML, Cruz ACR, Figueiredo LTM. Multiplex nested PCR for Brazilian Alphavirus diagnosis. *Transactions of the Royal Society of Tropical Medicine and Hygiene*. 2004;98. doi:10.1016/j.trstmh.2003.09.002
18. Vina-Rodriguez A, Eiden M, Keller M, Hinrichs W, Groschup MH. A quantitative real-time RT-PCR assay for the detection of venezuelan equine encephalitis virus utilizing a universal alphavirus control RNA. *BioMed Research International*. 2016;2016.  
doi:10.1155/2016/8543204
19. Claudino-Sales V. Darien National Park, Panama. Coastal Research Library. 2019.  
doi:10.1007/978-94-024-1528-5\_10
20. Carrera JP, Bagamian KH, Travassos Da Rosa AP, Wang E, Beltran D, Gundaker ND, et al. Human and equine infection with alphaviruses and flaviviruses in panamá during 2010: A Cross-Sectional study of household contacts during an encephalitis outbreak. *American Journal of Tropical Medicine and Hygiene*. 2018. doi:10.4269/ajtmh.17-0679
21. Sallum MAM, Forattini OP. Revision of the spissipes section of culex (melanoconion) (diptera: Culicidae). *Journal of the American Mosquito Control Association*. 1996.
22. Johnson BW, Kosoy O, Wang E, Delorey M, Russell B, Bowen RA, et al. Use of Sindbis/eastern equine encephalitis chimeric viruses in plaque reduction neutralization tests for arboviral disease diagnostics. *Clinical and Vaccine Immunology*. 2011;18.  
doi:10.1128/CVI.05129-11
23. Quiroz E, Aguilar P v., Cisneros J, Tesh RB, Weaver SC. Venezuelan equine encephalitis in Panama: Fatal endemic disease and genetic diversity of etiologic viral strains. *PLoS Neglected Tropical Diseases*. 2009. doi:10.1371/journal.pntd.0000472
24. Benson DA, Cavanaugh M, Clark K, Karsch-Mizrachi I, Ostell J, Pruitt KD, et al. GenBank. *Nucleic Acids Research*. 2018. doi:10.1093/nar/gkx1094
25. Fitzgibbon JE, Sagripanti JL. Simultaneous identification of orthopoxviruses and alphaviruses by oligonucleotide macroarray with special emphasis on detection of variola and Venezuelan equine encephalitis viruses. *Journal of Virological Methods*. 2006;131.  
doi:10.1016/j.jviromet.2005.08.007
26. Relova D, Rios L, Acevedo AM, Coronado L, Perera CL, Pérez LJ. Impact of RNA degradation on viral diagnosis: An understated but essential step for the successful establishment of a diagnosis network. *Veterinary Sciences*. 2018;5.  
doi:10.3390/vetsci5010019
27. Luciani K, Abadía I, Martínez-Torres AO, Cisneros J, Guerra I, García M, et al. Case report: Madariaga virus infection associated with a case of acute disseminated encephalomyelitis. *American Journal of Tropical Medicine and Hygiene*. 2015;92.  
doi:10.4269/ajtmh.14-0845

28. Torres-ruesta A, Chee RSL, Ng LFP. Insights into antibody-mediated alphavirus immunity and vaccine development landscape. *Microorganisms*. 2021. doi:10.3390/microorganisms9050899
29. Torres R, Samudio R, Carrera JP, Young J, Maâriquez R, Hurtado L, et al. Enzootic mosquito vector species at equine encephalitis transmission foci in the República de Panama. *PLoS ONE*. 2017. doi:10.1371/journal.pone.0185491
30. Carrera J-P, Cucunuba ZM, Neira K, Lambert B, Pitti Y, Liscano J, et al. Endemic and epidemic human alphavirus infections in eastern Panama: An analysis of population-based cross-sectional surveys. *American Journal of Tropical Medicine and Hygiene*. 2020;10: 901462. doi:10.4269/ajtmh.20-0408
31. Dietz WH, Galindo P, Johnson KM, Galindo P, Dietz WH. Eastern equine encephalomyelitis in Panama: The epidemiology of the 1973 epizootic. *American Journal of Tropical Medicine and Hygiene*. 1980;29: 133–140. doi:10.4269/ajtmh.1980.29.133
32. Srihongse S, Galindo P. The isolation of eastern equine encephalitis virus from *Culex* (Melanoconion) taeniopus Dyar and Knab in Panama. *Mosquito News* . 1967;27: 74–76.
33. Esri inc. Esri World Topographic Map. ArcGIS Online. 2021.

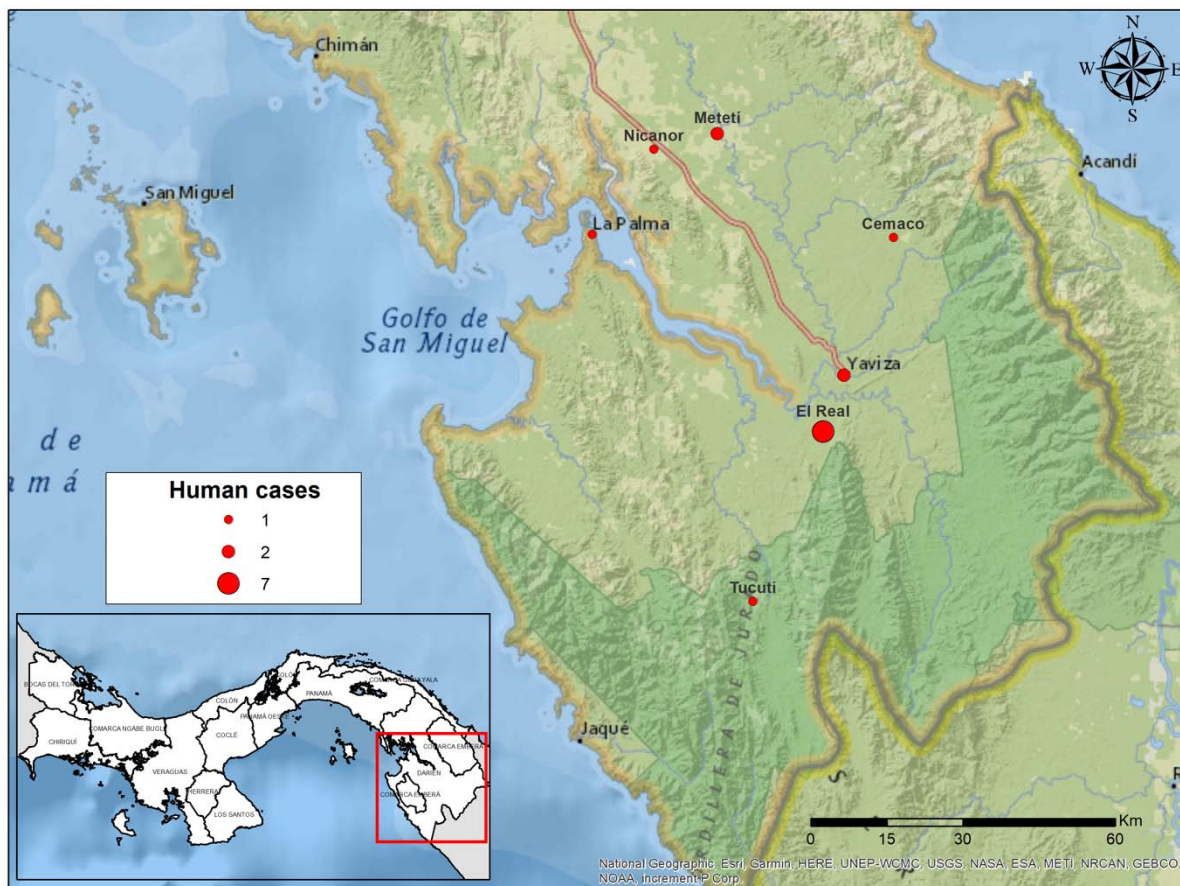

**Figure 1. Map with the distribution of VEEV human cases in Darien province, Panama.**

Red dots represent the number of cases reported by locality. Map was created with ArcGIS Desktop 10.6 using shapefiles from Esri. Data sources for the shapefiles include Esri, Garmin International Inc., US Central Intelligence Agency, and National Geographic Society[33]



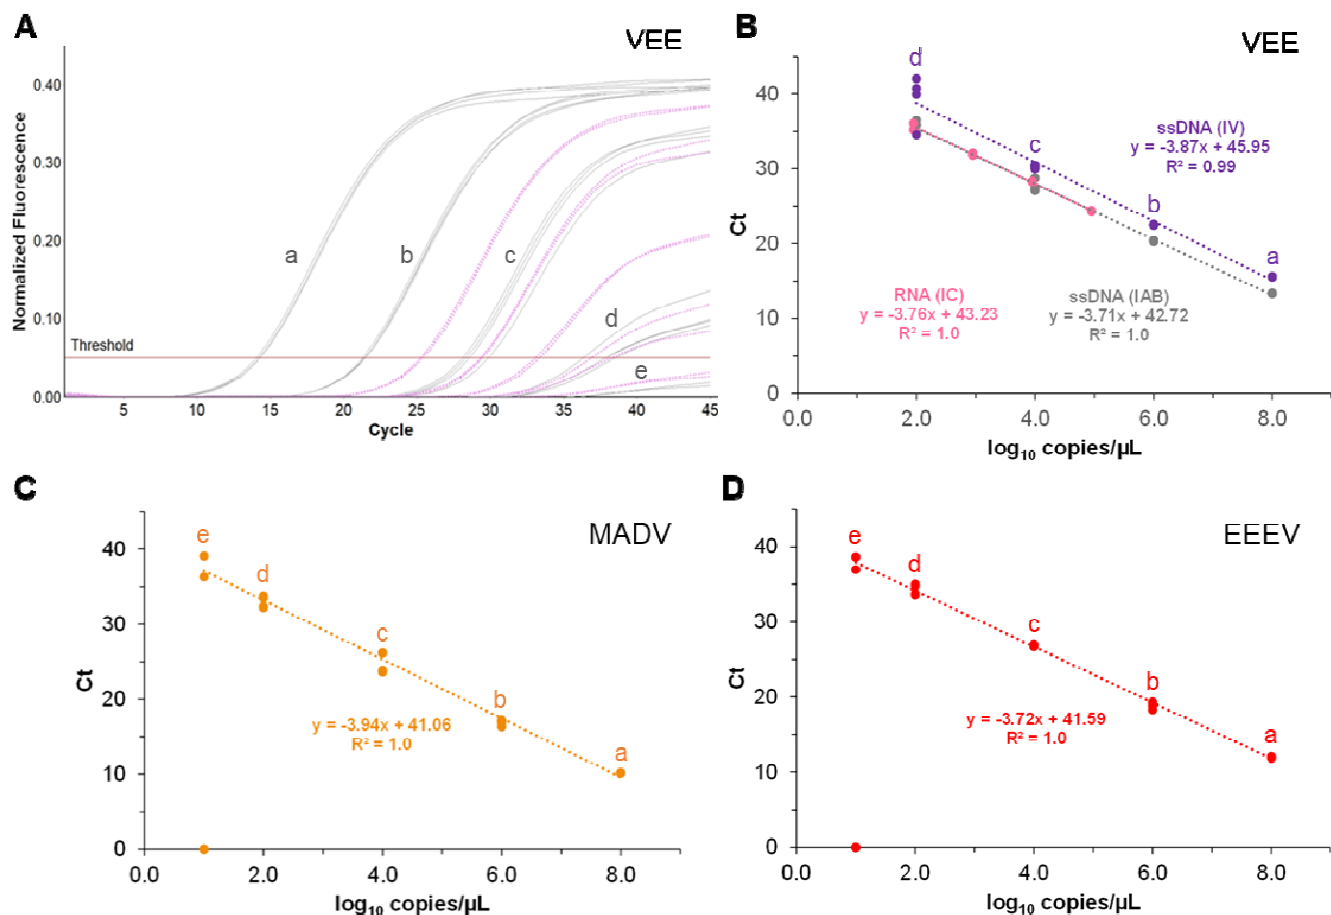

**Figure 2. VEE and MADV/EEEV rRT-PCR linearity and limit of detection. A)**

Amplification curves across the linear range of the VEE complex rRT-PCR with ssDNA (gray curves, subtype IAB) and RNA (pink dotted curves, subtype IC). **B)** Linearity and limit of detection for VEE were evaluated with ssDNA from subtypes IAB (grey) and IV (purple) and RNA from subtype IC (pink). **(C-D)** Linearity and limit of detection for MADV (C) and EEEV (D) were evaluated using ssDNA. For each virus, ssDNA was tested in quadruplicate at 8.0, 6.0, 4.0, 2.0 and 1.0  $\log_{10}$  copies/ $\mu$ L (labelled a-e, respectively). 10-fold dilutions of VEEV subtype IC RNA were tested in duplicate starting at the highest concentration available (5.0  $\log_{10}$  copies/ $\mu$ L). All data points are displayed, including 2/4 MADV and EEEV replicates that did not yield cycle threshold (Ct) values and were excluded from the linear regressions.

**Table 1. Characteristics of clinical samples and laboratory results.** Acute samples selected from the 2015 and 2017 Alphavirus outbreaks in Darien Province.  
Abbreviations: Ct, cycle threshold; neg, negative; pos, positive

| Code   | Township | Age*      | Sex | Symptom onset | Days of symptoms | RT-PCR - Alpha (2015) | RT-PCR - Alpha (2021) | rRT-PCR - VEEV | Ct values | IgM-VEEV | IgM-MADV | IgG-VEEV | IgG-MADV | PRNT-VEEV $\phi$ | PRNT-MADV $\phi$ |
|--------|----------|-----------|-----|---------------|------------------|-----------------------|-----------------------|----------------|-----------|----------|----------|----------|----------|------------------|------------------|
| 258384 | El Real  | 0-9       | M   | Aug. 2015     | 0                | pos                   | neg                   | pos            | 29.3      | neg      | neg      | neg      | neg      | <1:20            | <1:20            |
| 267738 | Cemaco   | 0-9       | M   | July 2017     | 3                | neg                   | neg                   | pos            | 37.8      | pos      | neg      | neg      | neg      | <1:20            | <1:20            |
| 267411 | Tucuti   | 0-9       | F   | July 2017     | 5                | neg                   | neg                   | neg            | -         | pos      | neg      | pos      | pos      | 1:40             | 1:40             |
| 258380 | El Real  | 0-9       | F   | Aug. 2015     | 1                | pos                   | neg                   | neg            | -         | neg      | neg      | neg      | neg      | <1:20            | <1:20            |
| 267410 | Yaviza   | 0-9       | F   | July 2017     | 2                | neg                   | neg                   | neg            | -         | pos      | neg      | pos      | neg      | <1:20            | <1:20            |
| 258657 | Yaviza   | 10-19     | M   | Sept. 2015    | 0                | pos                   | neg                   | pos            | 28        | neg      | neg      | neg      | neg      | <1:20            | <1:20            |
| 258535 | Nicanor  | 20-29     | F   | Sept. 2015    | 2                | pos                   | neg                   | neg            | -         | neg      | neg      | neg      | neg      | <1:20            | <1:20            |
| 258401 | La Palma | 20-29     | M   | Aug. 2015     | 2                | pos                   | neg                   | pos            | 29        | neg      | neg      | neg      | neg      | <1:20            | <1:20            |
| 258395 | Metetí   | 30-39     | M   | Aug. 2015     | 2                | neg                   | neg                   | pos            | 37        | pos      | neg      | neg      | neg      | <1:20            | <1:20            |
| 258399 | El Real  | 30-39     | M   | Aug. 2015     | 1                | pos                   | neg                   | pos            | 26        | neg      | neg      | neg      | neg      | <1:20            | <1:20            |
| 258385 | El Real  | 30-39     | M   | Aug. 2015     | 2                | pos                   | neg                   | pos            | 37        | neg      | neg      | neg      | neg      | <1:20            | <1:20            |
| 258398 | El Real  | 30-39     | M   | Aug. 2015     | 0                | pos                   | neg                   | pos            | 27        | neg      | neg      | pos      | neg      | <1:20            | <1:20            |
| 258536 | Metetí   | 30-39     | F   | Sept. 2015    | 2                | pos                   | neg                   | neg            | -         | neg      | neg      | neg      | neg      | <1:20            | <1:20            |
| 258386 | El Real  | 30-39     | M   | Aug. 2015     | 5                | pos                   | neg                   | pos            | 34        | neg      | neg      | neg      | neg      | N/D              | N/D              |
| 258379 | El Real  | $\geq 40$ | F   | Aug. 2015     | 2                | pos                   | neg                   | pos            | 31        | neg      | neg      | neg      | neg      | <1:20            | <1:20            |

\*Age categories in year s

$\phi$  Base on PRNT-80



**Table 2. Species of mosquitos collected during the 2015 outbreak in El Real de Santa Maria, Panama.**

| Species                               | number | (%)  | # Pools | VEEV-rRT-PCR | MADV-rRT-PCR | Isolates |
|---------------------------------------|--------|------|---------|--------------|--------------|----------|
| <i>Coquillettidia venezuelensis</i>   | 490    | 37.5 | 29      | 0            | 0            | 0        |
| <i>Culex (Melanoconion) vomerifer</i> | 450    | 34.4 | 27      | 3            | 0            | 2        |
| <i>Culex (Melanoconion) pedroi</i>    | 32     | 2.4  | 4       | 0            | 0            | 0        |
| <i>Aedes serratus</i>                 | 31     | 2.4  | 7       | 0            | 0            | 0        |
| <i>Aedes sp.</i>                      | 30     | 2.3  | 5       | 0            | 0            | 0        |
| <i>Culex (Melanoconion) sp.</i>       | 30     | 2.3  | 6       | 0            | 0            | 0        |
| <i>Culex (Culex) interrogator</i>     | 27     | 2.1  | 5       | 0            | 0            | 0        |
| <i>Anopheles trianulatus</i>          | 23     | 1.8  | 2       | 0            | 0            | 0        |
| <i>Aedes eupoclamus</i>               | 14     | 1.1  | 4       | 0            | 0            | 0        |
| <i>Culex (Culex) nigripalpus</i>      | 14     | 1.1  | 3       | 0            | 0            | 0        |
| <i>Culex (Culex) sp.</i>              | 14     | 1.0  | 4       | 0            | 0            | 0        |
| <i>Culex (Melanoconion) atratus</i>   | 14     | 1.0  | 1       | 0            | 0            | 0        |
| <i>Culex (Melanoconion) adamesi</i>   | 13     | 1.0  | 3       | 0            | 0            | 0        |
| Others*                               | 125    | 9.6  | 50      | 0            | 0            | 0        |
| Total                                 | 1307   | 100  | 150     | 3            | 0            | 2        |

\* Species <1% abundance are listed as Others.

# Numbers of mosquito pools

**Table 3.** Primers and probes in the VEEV and MADV/EEEV rRT-PCRs.

| Name             | Sequence <sup>a</sup>                      | Concentration (nM) <sup>b</sup> | Location (5'-3') <sup>c</sup> | Sequences Fully Matching <sup>d</sup> |
|------------------|--------------------------------------------|---------------------------------|-------------------------------|---------------------------------------|
| <i>VEEV</i>      |                                            |                                 |                               |                                       |
| VEEV Forward 1   | GAAAGTTCACGTTGAYATCGAGGA                   | 200                             | 44-67                         | 156/159 (98)                          |
| VEEV Forward 2   | GAAGGTTACGTTGAYATCGAGGA                    | 200                             |                               |                                       |
| VEEV Reverse 1   | GCTCTGGCRRTTAGCATGGTC                      | 200                             | 144-163                       | 159/159 (100)                         |
| VEEV Reverse 2   | GCTCTAGCRRTTAGCATGGTC                      | 200                             |                               |                                       |
| VEEV Probe       | 5'-FAM-TTGAGGTAGAAGCHAAGCAGGTC-BHQ-1-3'    | 400                             | 112-134                       | 158/159 (99)                          |
| <i>MADV/EEEV</i> |                                            |                                 |                               |                                       |
| ME Forward       | GAGATAGAAGCMACGCAGGTC                      | 400                             | 121-141; 99-119               | 31/32 (97); 1/449 (100)               |
| ME Reverse       | TGYTTGGAATGCGTGTGC                         | 400                             | 255-272; 233-250              | 32/32 (100); 9/449 (98)               |
| MADV Probe       | 5'-FAM-CATCGAAAGCGAAGTGGACC-BHQ-1-3'       | 200                             | 195-214                       | 31/32 (97)                            |
| EEEV Probe       | 5'-CFO560-TGAGGGAGAAGTGGAYACAGACC-BHQ-1-3' | 400                             | 176-198                       | 6/449 (99)                            |

Abbreviations: BHQ, black hole quencher; CFO560, CAL Fluor Orange 560; FAM, Fluorescein

<sup>a</sup> probe sequences listed 5'-fluorophore-sequence-quencher-3'

<sup>b</sup> Concentration in the final reaction mixture

<sup>c</sup> Location in the following complete genome sequences: VEEV strain VEEV/Homo sapiens/GTM/69Z1/1969/IAB (Accession number KC344505.2); MADV strain Homo sapiens/Haiti-1901/2016 (MH359233.1); EEEV strain EEEV/Culiseta melanura/USA/SL13-0764-C/2013 (Accession number KX029319.1)

<sup>d</sup> Displayed as number of complete genome sequences without a mismatch in the primer/probe sequence over all complete genome sequences aligned (%). Genomes downloaded 22 Sept 2021. Data shown for the combination of forward and reverse VEEV primers.
